# Supplementary material
Source: Springer Nature journal article supplement (https://www.springermedizin.de/resource/supplementary/12936_2010_1328_MOESM5_ESM.pdf/9549544)
Supplement: MOESM5 [file 9549544]

# Prevalence of dhps double mutant genotype (A437G, K540E) in African *P. falciparum* populations

FINAL - FOR INTERNAL AND EXTERNAL RELEASE | GRASP PRJ ID 03446 | DATESTAMP: 11/12/2009

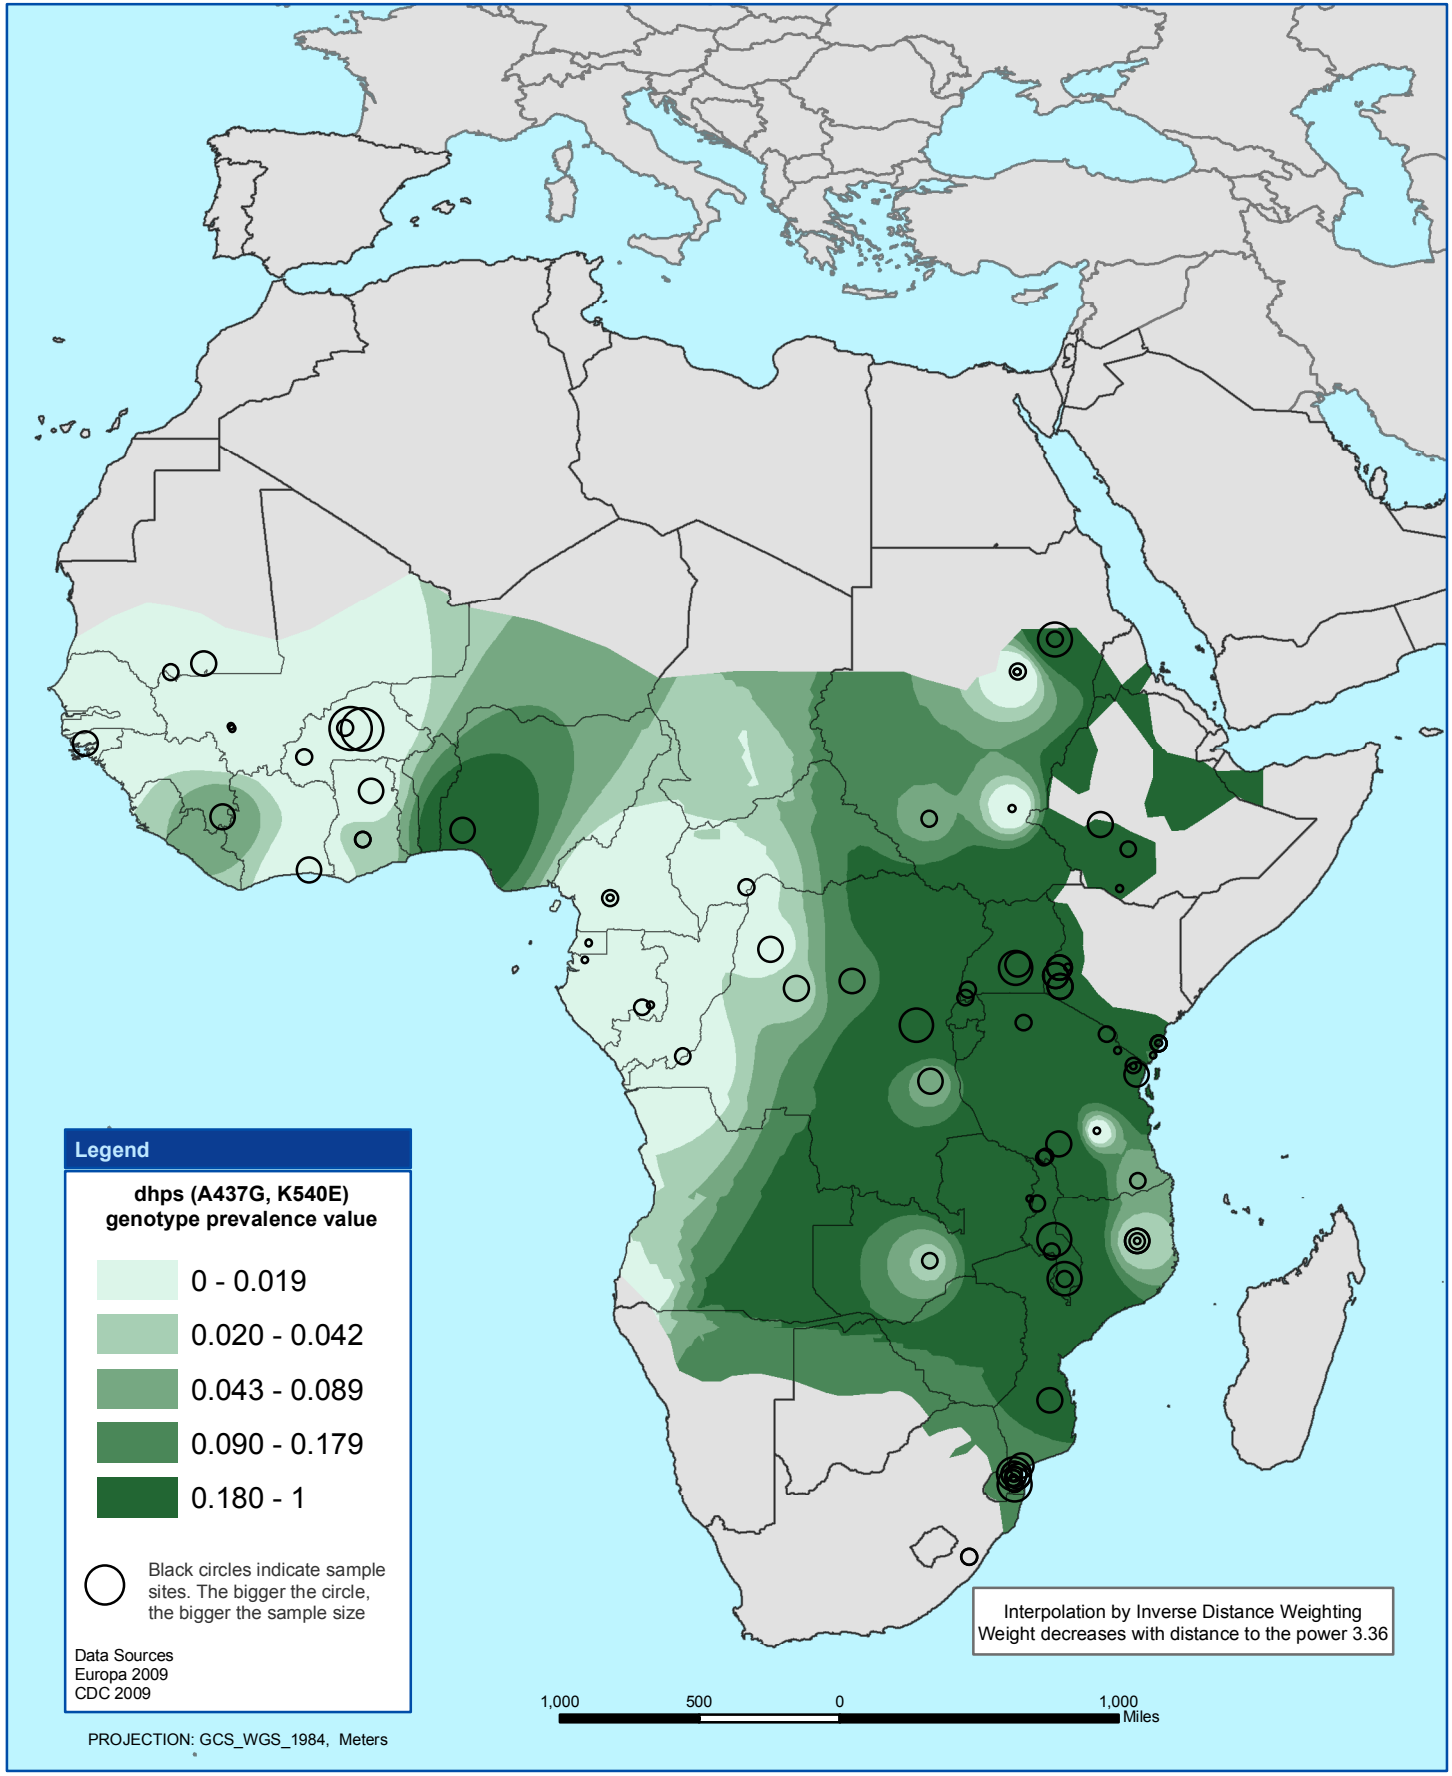

**Legend**

**dhps (A437G, K540E) genotype prevalence value**

- 0 - 0.019
- 0.020 - 0.042
- 0.043 - 0.089
- 0.090 - 0.179
- 0.180 - 1

Black circles indicate sample sites. The bigger the circle, the bigger the sample size

Data Sources  
 Europa 2009  
 CDC 2009

Interpolation by Inverse Distance Weighting  
 Weight decreases with distance to the power 3.36

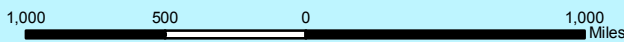

PROJECTION: GCS\_WGS\_1984, Meters
